# Supplementary material for: Yeasts Associated with the Small-Intestinal Contents and Epithelium of Pon Yang Kham (Charolais Crossbred) Fattening Beef Cattle
Source: MDPI journal article supplement (doi:10.3390/microorganisms9071444), 2021-07-04
Supplement: s1 [file s1]

## Supplementary Material

**Table S1:** Identification of yeast from duodenal Pia samples based on the D1/D2 domain sequence analysis.

| Taxa                            | No. of strain | strain                                                                                                                                                                                                                                                                                                                                                                                                                                                                                                                                                                              | D1/D2 GenBank accession no. of closest species | Nucleotide substitutions to closest species | NO.of samples |
|---------------------------------|---------------|-------------------------------------------------------------------------------------------------------------------------------------------------------------------------------------------------------------------------------------------------------------------------------------------------------------------------------------------------------------------------------------------------------------------------------------------------------------------------------------------------------------------------------------------------------------------------------------|------------------------------------------------|---------------------------------------------|---------------|
| <b>Ascomycota</b>               |               |                                                                                                                                                                                                                                                                                                                                                                                                                                                                                                                                                                                     |                                                |                                             |               |
| <b>Pezizomycotina</b>           |               |                                                                                                                                                                                                                                                                                                                                                                                                                                                                                                                                                                                     |                                                |                                             |               |
| Herpotrichiellaceae             |               |                                                                                                                                                                                                                                                                                                                                                                                                                                                                                                                                                                                     |                                                |                                             |               |
| <i>Exophiala dermatitidis</i>   | 2             | PYD3-1, PYD93-25                                                                                                                                                                                                                                                                                                                                                                                                                                                                                                                                                                    | NG059225                                       | 0                                           | 2             |
| Sacotheciaceae                  |               |                                                                                                                                                                                                                                                                                                                                                                                                                                                                                                                                                                                     |                                                |                                             |               |
| <i>Aureobasidium elanogenum</i> | 3             | PYD95-7, PYD95-13, PYD95-14                                                                                                                                                                                                                                                                                                                                                                                                                                                                                                                                                         | FJ150926                                       | 0,3                                         | 1             |
| <b>Saccharomycotina</b>         |               |                                                                                                                                                                                                                                                                                                                                                                                                                                                                                                                                                                                     |                                                |                                             |               |
| Debaryomycetaceae               |               |                                                                                                                                                                                                                                                                                                                                                                                                                                                                                                                                                                                     |                                                |                                             |               |
| <i>Candida metapsilosis</i>     | 12            | PCD1-1, PCD3-8, PYD88-14, PYD88-15, PCD88-2, PCD92-3, PYD93-8, PCD93-17, PCD93-20, PYD95-3, PYD96-15, PYD96-21                                                                                                                                                                                                                                                                                                                                                                                                                                                                      | NG054815                                       | 0-1                                         | 7             |
| <i>Candida orthopsilosis</i>    | 81            | PYD1-6, PYD3-2, PYD3-8, PCD3-1, PCD3-2, PCD3-7, PYD6-3, PYD88-3, PYD88-13, PCD88-3, PCD88-6, PCD89-2, PCD90-3, PCD90-21, PCD90-26, PYD91-3, PYD91-6, PYD91-7, PYD93-1, PYD93-2, PYD93-4, PYD93-9, PYD93-12, PYD93-15, PYD93-18, PYD93-20, PYD93-21, PYD93-23, PYD93-24, PYD93-27, PCD93-1, PCD93-2, PCD93-3, PCD93-4, PCD93-6, PCD93-7, PCD93-8, PCD93-9, PCD93-10, PCD93-12, PCD93-13, PCD93-14, PYD95-2, PYD95-5, PYD95-9, PYD95-10, PYD95-12, PYD95-15, PYD95-16, PYD95-17, PYD95-19, PCD95-1, PCD95-3, PCD95-5, PCD95-10, PCD95-12, YD96-1, PYD96-2, PYD96-5, PYD96-7, PYD96-9, | FJ746056                                       | 0-1                                         | 12            |

| Taxa                        | No. of strain | strain                                                                                                                                                                                                                                                                                                                                                                                                                                                                                                                                                                                                                                                                                                                                                                                                                                                                                                                  | D1/D2 GenBank accession no. of closest species | Nucleotide substitutions to closest species | NO.of samples |
|-----------------------------|---------------|-------------------------------------------------------------------------------------------------------------------------------------------------------------------------------------------------------------------------------------------------------------------------------------------------------------------------------------------------------------------------------------------------------------------------------------------------------------------------------------------------------------------------------------------------------------------------------------------------------------------------------------------------------------------------------------------------------------------------------------------------------------------------------------------------------------------------------------------------------------------------------------------------------------------------|------------------------------------------------|---------------------------------------------|---------------|
| <i>Candida parapsilosis</i> | 77            | PYD96-12, PYD96-13, PYD96-17, PYD96-18, PYD96-19, PYD96-22, PCD96-2, PCD96-3, PYD98-3, PYD98-4, PYD98-6, PYD98-10, PYD98-12, PCD98-3, PYD100-1, PYD100-4, PYD100-7, PCD100-1, PCD100-2, PCD100-4<br>PYD1-4, PYD1-8, PCD1-2, PCD1-4, PYD2-3, PCD2-1, PCD2-2, PCD2-3, PYD3-4, PYD3-7, PCD3-3, PYD5-8, PCD5-2, PCD5-4, PYD6-1, PYD6-2, PCD6-1, PCD6-2, PCD6-3, PYD88-2, PYD88-4, PYD88-5, PYD88-6, PYD88-9, PYD88-12, PCD88-1, PCD88-4, PCD88-5, PYD89-3, PYD89-5, PYD89-7, PCD89-1, PYD90-10, PYD90-14, PYD91-4, PYD91-8, PYD91-9, PCD91-2, PCD91-5, PYD92-1, PYD92-2, PYD92-3, PYD92-7, PYD92-9, PYD92-10, PCD92-1, PCD92-2, PCD92-4, PCD92-8, PCD92-9, PCD92-10, PCD95-11, PYD96-20, PYD96-24, PYD96-25, PCD96-1, PCD96-7, PCD96-8, PCD96-16, PYD98-2, PYD98-8, PYD98-9, PCD98-4, PCD98-6, PCD98-7, PCD98-9, PCD98-10, PYD99-1, PYD99-5, PYD99-10, PYD99-11, PCD99-3, PYD100-3, PYD100-5, PYD100-6, PYD100-9, PYD100-10 | U45754                                         | 0-2                                         | 15            |
| <i>Candida tropicalis</i>   | 32            | PYD5-1, PYD5-2, PYD5-3, PYD5-4, PYD5-5, PYD5-7, PYD5-9, PCD5-1, PCD5-3, PYD90-15, PYD90-19, PCD90-2, PCD90-4, PCD90-6, PCD90-8, PCD90-10, PCD90-11, PCD90-19, PCD92-5, PYD94-3, PCD94-1, PCD94-5, PCD95-7, PCD95-8, PYD97-13, PCD97-1, PCD97-2,                                                                                                                                                                                                                                                                                                                                                                                                                                                                                                                                                                                                                                                                         | NG054834                                       | 0-1                                         | 7             |

| Taxa                                   | No. of strain | strain                                                                                       | D1/D2 GenBank accession no. of closest species | Nucleotide substitutions to closest species | NO.of samples |
|----------------------------------------|---------------|----------------------------------------------------------------------------------------------|------------------------------------------------|---------------------------------------------|---------------|
|                                        |               | PCD97-3, PCD97-4, PCD97-7, PCD97-10, PYD98-11                                                |                                                |                                             |               |
| <i>Lodderomyces elongisporus</i>       | 2             | PYD1-5, PCD91-1                                                                              | U45763                                         | 0                                           | 2             |
| <i>Meyerozyma caribbica</i>            | 2             | PYD89-4, PCD97-8                                                                             | AY187283                                       | 0-1                                         | 2             |
| <i>Schwanniomyces etchellsii</i>       | 4             | PYD2-1, PYD2-4, PYD96-4, PYD100-2                                                            | U45809                                         | 0                                           | 3             |
| Metschnikowiaceae                      |               |                                                                                              |                                                |                                             |               |
| <i>Candida vulturna</i>                | 1             | PCD91-4                                                                                      | JX515965                                       | 2                                           | 1             |
| Phaffomycetaceae                       |               |                                                                                              |                                                |                                             |               |
| <i>Cyberlindnera aff. jadinii</i>      | 1             | PYD99-2                                                                                      | EF550309                                       | 6                                           | 1             |
| <i>Cyberlindnera jadinii</i>           | 6             | PYD94-1, PYD94-4, PYD94-6, PCD94-2, PCD94-6, PYD96-11                                        | EF550309                                       | 5                                           | 2             |
| Pichiaceae                             |               |                                                                                              |                                                |                                             |               |
| <i>Candida ethanolica</i>              | 1             | PYD90-25                                                                                     | U71073                                         | 0                                           | 1             |
| <i>Pichia kudriavzevii</i>             | 10            | PYD3-3, PYD90-6, PYD90-11, PYD90-24, PCD90-1, PCD90-7, PYD94-2, PYD94-5, PCD94-3, PCD94-4    | EF550222                                       | 0-1                                         | 3             |
| <i>Pichia manshurica</i>               | 5             | PYD2-5, PYD90-8, PYD90-17, PYD90-21, PYD92-5                                                 | U75738                                         | 0-1                                         | 3             |
| Saccharomycetaceae                     |               |                                                                                              |                                                |                                             |               |
| <i>Candida glabrata</i>                | 9             | PYD89-2, PYD89-8, PCD90-20, PYD97-1, PYD97-7, PYD97-9, PYD97-11, PCD97-9, PCD97-11           | U44808                                         | 1-2                                         | 3             |
| Saccharomycetales incertae sedis       |               |                                                                                              |                                                |                                             |               |
| <i>Diutina rugosa</i>                  | 10            | PCD3-4, PCD3-5, PCD3-6, PYD92-11, PYD92-12, PCD93-19, PYD95-18, PCD96-11, PCD96-13, PYD100-8 | KT336717                                       | 0-2                                         | 6             |
| Trichomonascaceae                      |               |                                                                                              |                                                |                                             |               |
| <i>Wickerhamiella aff. infanticola</i> | 2             | PYD90-26, PYD90-28                                                                           | DQ438230                                       | 6                                           | 1             |

| Taxa                             | No. of strain | strain                                                                   | D1/D2 GenBank accession no. of closest species | Nucleotide substitutions to closest species | NO.of samples |
|----------------------------------|---------------|--------------------------------------------------------------------------|------------------------------------------------|---------------------------------------------|---------------|
| <i>Wickerhamiella pararugosa</i> | 8             | PYD89-1, PCD90-17, PCD90-24, PYD92-8, PYD96-6, PYD97-4, PYD97-5, PYD97-6 | U62306                                         | 0, 1, 2, 5                                  | 5             |
| <b>Basidiomycota</b>             |               |                                                                          |                                                |                                             |               |
| <b>Agaricomycotina</b>           |               |                                                                          |                                                |                                             |               |
| Trichosporonaceae                |               |                                                                          |                                                |                                             |               |
| <i>Trichosporon asahii</i>       | 1             | PYD90-27                                                                 | AF105393                                       | 0                                           | 1             |
| <i>Trichosporon japonicum</i>    | 6             | PYD3-5, PYD88-1, PYD88-7, PYD88-8, PYD88-10, PYD95-8                     | AF308657                                       | 0                                           | 3             |
| <b>Pucciniomycotina</b>          |               |                                                                          |                                                |                                             |               |
| Sporidiobolaceae                 |               |                                                                          |                                                |                                             |               |
| <i>Rhodotorula mucilaginosa</i>  | 4             | PYD3-6, PYD93-22, PYD98-5, PCD98-5                                       | AF070432                                       | 0-1                                         | 3             |

**Table S2:** Identification of yeast from jejunal Pia samples based on the D1/D2 domain sequence analysis.

| Taxa                            | No. of strain | strain                                                                                                                                                                                                                                                                            | D1/D2 GenBank accession no. of closest species | Nucleotide substitutions to closest species | NO.of samples |
|---------------------------------|---------------|-----------------------------------------------------------------------------------------------------------------------------------------------------------------------------------------------------------------------------------------------------------------------------------|------------------------------------------------|---------------------------------------------|---------------|
| <b>Ascomycota</b>               |               |                                                                                                                                                                                                                                                                                   |                                                |                                             |               |
| <b>Pezizomycotina</b>           |               |                                                                                                                                                                                                                                                                                   |                                                |                                             |               |
| Herpotrichiellaceae             |               |                                                                                                                                                                                                                                                                                   |                                                |                                             |               |
| <i>Exophiala dermatitidis</i>   | 2             | PYJ97-10, PYJ97-11                                                                                                                                                                                                                                                                | NG059225                                       | 0                                           | 1             |
| Sacchotheciaceae                |               |                                                                                                                                                                                                                                                                                   |                                                |                                             |               |
| <i>Aureobasidium elanogenum</i> | 2             | PYJ95-5, PCJ95-4                                                                                                                                                                                                                                                                  | FJ150926                                       | 1                                           | 1             |
| <b>Saccharomycotina</b>         |               |                                                                                                                                                                                                                                                                                   |                                                |                                             |               |
| Debaryomycetaceae               |               |                                                                                                                                                                                                                                                                                   |                                                |                                             |               |
| <i>Candida albicans</i>         | 9             | PYJ94-5, PCJ94-1, PCJ94-2, PCJ94-9, PYJ100-1, PYJ100-4, PYJ100-5, PYJ100-6, PYJ100-7                                                                                                                                                                                              | U45776                                         | 0-1                                         | 2             |
| <i>Candida metapsilosis</i>     | 2             | PCJ91-1, PYJ99-1                                                                                                                                                                                                                                                                  | NG054815                                       | 0-1                                         | 2             |
| <i>Candida orthopsilosis</i>    | 29            | PCJ6-4, PYJ88-1, PYJ88-2, PYJ88-5, PYJ88-7, PCJ88-6, PCJ89-2, PCJ89-5, PCJ89-8, PCJ89-9, PYJ91-2, PYJ91-6, PYJ91-7, PCJ91-4, PCJ92-2, PYJ93-2, PYJ93-8, PYJ93-10, PYJ93-11, PYJ93-14, PYJ93-17, PCJ93-2, PCJ93-6, PCJ95-8, PCJ96-4, PYJ98-3, PYJ98-5, PYJ98-13, PCJ98-3,          | FJ746056                                       | 0-1                                         | 9             |
| <i>Candida parapsilosis</i>     | 40            | PYJ1-2, PCJ1-2, PCJ1-5, PCJ1-6, PCJ2-1, PCJ2-2, PCJ2-3, PYJ3-1, PYJ6-1, PYJ6-2, PCJ6-1, PCJ6-2, PCJ6-3, PCJ6-5, PYJ88-4, PYJ88-6, PYJ88-8, PCJ88-1, PCJ88-2, PCJ88-3, PCJ88-5, PCJ89-3, PCJ89-4, PYJ91-1, PYJ91-5, PCJ91-5, PCJ92-4, PCJ93-1, PYJ95-3, PCJ95-1, PCJ95-3, PYJ96-4, | U45754                                         | 0-1                                         | 14            |

| Taxa                              | No. of strain | strain                                                                                                                                                                                                                                                                                                                                                                                                                                                                                            | D1/D2 GenBank accession no. of closest species | Nucleotide substitutions to closest species | NO.of samples |
|-----------------------------------|---------------|---------------------------------------------------------------------------------------------------------------------------------------------------------------------------------------------------------------------------------------------------------------------------------------------------------------------------------------------------------------------------------------------------------------------------------------------------------------------------------------------------|------------------------------------------------|---------------------------------------------|---------------|
| <i>Candida tropicalis</i>         | 44            | PYJ96-5, PCJ96-1, PCJ96-2, PYJ98-9, PCJ98-5, PYJ99-2, PCJ100-1, PCJ100-3<br>PYJ5-1, PYJ5-2, PYJ5-3, PYJ5-5, PCJ5-1, PCJ5-2, PCJ5-3, PYJ90-5, PYJ90-14, PYJ90-16, PYJ90-18, PYJ90-24, PCJ90-4, PCJ90-5, PCJ90-6, PCJ90-12, PCJ90-13, PCJ90-17, PCJ90-18, PCJ90-22, PYJ92-1, PCJ92-1, PCJ92-3, PCJ93-3, PYJ94-3, PYJ94-10, PYJ95-1, PYJ95-6, PCJ95-2, PCJ95-6, PCJ95-7, PCJ97-1, PCJ97-4, PCJ97-6, PYJ98-2, PYJ98-10, PYJ98-12, PYJ98-19, PCJ98-4, PYJ100-2, PYJ100-3, PCJ100-2, PCJ100-5, PCJ100-8 | NG054834                                       | 0-2                                         | 9             |
| <i>Schwanniomyces etchellsii</i>  | 3             | PYJ2-1, PYJ2-2, PYJ2-3                                                                                                                                                                                                                                                                                                                                                                                                                                                                            | U45809                                         | 0                                           | 1             |
| <i>Yamadazyma olivae</i>          | 1             | PYJ88-3                                                                                                                                                                                                                                                                                                                                                                                                                                                                                           | FJ71543                                        | 0                                           | 1             |
| Metschnikowiaceae                 |               |                                                                                                                                                                                                                                                                                                                                                                                                                                                                                                   |                                                |                                             |               |
| <i>Candida vulturna</i>           | 1             | PCJ91-2                                                                                                                                                                                                                                                                                                                                                                                                                                                                                           | JX515965                                       | 2                                           | 1             |
| Phaffomycetaceae                  |               |                                                                                                                                                                                                                                                                                                                                                                                                                                                                                                   |                                                |                                             |               |
| <i>Cyberlindnera aff. jadinii</i> | 2             | PCJ90-11, PCJ90-16                                                                                                                                                                                                                                                                                                                                                                                                                                                                                | EF550309                                       | 6                                           | 1             |
| <i>Cyberlindnera jadinii</i>      | 8             | PYJ92-4, PYJ93-5, PCJ93-4, PCJ93-5, PYJ94-7, PYJ94-8, PCJ94-7, PYJ96-9                                                                                                                                                                                                                                                                                                                                                                                                                            | EF550309                                       | 3-5                                         | 4             |
| Pichiaceae                        |               |                                                                                                                                                                                                                                                                                                                                                                                                                                                                                                   |                                                |                                             |               |
| <i>Pichia kudriavzevii</i>        | 6             | PYJ90-10, PYJ90-17, PCJ90-7, PCJ90-19, PYJ94-2, PYJ94-9                                                                                                                                                                                                                                                                                                                                                                                                                                           | EF550222                                       | 0-1                                         | 2             |
| <i>Pichia manshurica</i>          | 9             | PYJ89-4, PYJ89-8, PYJ90-4, PYJ90-20, PYJ90-25, PCJ90-1, PYJ92-2, PYJ98-22, PYJ99-3                                                                                                                                                                                                                                                                                                                                                                                                                | U75738                                         | 0, 2                                        | 5             |
| Saccharomycetaceae                |               |                                                                                                                                                                                                                                                                                                                                                                                                                                                                                                   |                                                |                                             |               |
| <i>Candida glabrata</i>           | 12            | PYJ89-2, PYJ89-3, PYJ89-6, PYJ89-9, PYJ90-7, PYJ97-2, PYJ97-5, PYJ97-7, PYJ97-8, PYJ97-9, PYJ97-12, PCJ97-3                                                                                                                                                                                                                                                                                                                                                                                       | U44808                                         | 0-2                                         | 3             |
| Saccharomycetales incertae sedis  |               |                                                                                                                                                                                                                                                                                                                                                                                                                                                                                                   |                                                |                                             |               |

| Taxa                             | No. of strain | strain                                                                                                                                                                                             | D1/D2 GenBank accession no. of closest species | Nucleotide substitutions to closest species | NO.of samples |
|----------------------------------|---------------|----------------------------------------------------------------------------------------------------------------------------------------------------------------------------------------------------|------------------------------------------------|---------------------------------------------|---------------|
| <i>Diutina rugosa</i>            | 7             | PYJ93-7, PYJ93-16, PYJ94-1, PCJ94-4, PCJ94-6, PCJ94-10, PYJ95-4                                                                                                                                    | KT336717                                       | 0                                           | 3             |
| Trichomonascaceae                |               |                                                                                                                                                                                                    |                                                |                                             |               |
| <i>Wickerhamiella pararugosa</i> | 21            | PYJ89-1, PYJ90-3, PYJ90-26, PCJ90-2, PCJ90-9, PYJ93-6, PYJ93-18, PYJ93-19, PCJ93-7, PCJ93-8, PYJ96-7, PYJ96-10, PYJ97-1, PYJ97-4, PYJ97-6, PCJ97-2, PCJ97-7, PYJ98-17, PYJ98-21, PYJ99-6, PYJ99-10 | U62306                                         | 0-2                                         | 7             |
| <b>Basidiomycota</b>             |               |                                                                                                                                                                                                    |                                                |                                             |               |
| <b>Agaricomycotina</b>           |               |                                                                                                                                                                                                    |                                                |                                             |               |
| Trichosporonaceae                |               |                                                                                                                                                                                                    |                                                |                                             |               |
| <i>Trichosporon japonicum</i>    | 1             | PCJ3-1                                                                                                                                                                                             | AF308657                                       | 0                                           | 1             |
| <b>Pucciniomycotina</b>          |               |                                                                                                                                                                                                    |                                                |                                             |               |
| Sporidiobolaceae                 |               |                                                                                                                                                                                                    |                                                |                                             |               |
| <i>Rhodotorula mucilaginosa</i>  | 1             | PYJ96-6                                                                                                                                                                                            | AF070432                                       | 0-1                                         | 1             |

**Table S3:** Identification of yeast from ileal Pia samples based on the D1/D2 domain sequence analysis.

| Taxa                            | No. of strain | strain                                                                                                                                                                                                                                                                                                                                                                                                                               | D1/D2 GenBank accession no. of closest species | Nucleotide substitutions to closest species | NO.of samples |
|---------------------------------|---------------|--------------------------------------------------------------------------------------------------------------------------------------------------------------------------------------------------------------------------------------------------------------------------------------------------------------------------------------------------------------------------------------------------------------------------------------|------------------------------------------------|---------------------------------------------|---------------|
| <b>Ascomycota</b>               |               |                                                                                                                                                                                                                                                                                                                                                                                                                                      |                                                |                                             |               |
| <b>Pezizomycotina</b>           |               |                                                                                                                                                                                                                                                                                                                                                                                                                                      |                                                |                                             |               |
| Herpotrichiellaceae             |               |                                                                                                                                                                                                                                                                                                                                                                                                                                      |                                                |                                             |               |
| <i>Exophiala dermatitidis</i>   | 3             | PYI95-20, PYI97-6, PYI97-7                                                                                                                                                                                                                                                                                                                                                                                                           | NG059225                                       | 0                                           | 2             |
| Sacotheciaceae                  |               |                                                                                                                                                                                                                                                                                                                                                                                                                                      |                                                |                                             |               |
| <i>Aureobasidium elanogenum</i> | 3             | PYI95-11, PYI95-16, PCI95-6                                                                                                                                                                                                                                                                                                                                                                                                          | FJ150926                                       | 1                                           | 1             |
| <b>Saccharomycotina</b>         |               |                                                                                                                                                                                                                                                                                                                                                                                                                                      |                                                |                                             |               |
| Debaryomycetaceae               |               |                                                                                                                                                                                                                                                                                                                                                                                                                                      |                                                |                                             |               |
| <i>Candida albicans</i>         | 10            | PYI94-1, PYI94-5, PYI94-10, PCI94-2, PCI94-5, PYI100-4, PYI100-8, PCI100-1, PCI100-2, PCI100-5                                                                                                                                                                                                                                                                                                                                       | U45776                                         | 0-1                                         | 2             |
| <i>Candida metapsilosis</i>     | 6             | PYI88-1, PYI88-2, PYI93-2, PYI93-11, PYI95-1, PYI100-6                                                                                                                                                                                                                                                                                                                                                                               | NG054815                                       | 0-1                                         | 4             |
| <i>Candida orthopsilosis</i>    | 45            | PCI6-2, PYI89-3, PYI89-5, PYI89-6, PCI89-5, PCI89-7, PCI89-12, PCI89-13, PYI90-4, PYI91-2, PYI91-4, PYI93-1, PYI93-6, PYI93-10, PYI93-13, PCI93-1, PCI93-4, PCI93-8, PCI93-10, PYI95-2, PYI95-3, PYI95-7, PYI95-8, PYI95-10, PYI95-12, PYI95-13, PYI95-18, PCI95-1, PCI95-2, PCI95-7, PCI95-8, PCI95-9, PCI95-11, PCI95-13, PCI95-15, PCI95-18, PYI96-3, PYI96-4, PYI96-22, PCI96-1, PCI98-6, PYI99-5, PYI100-5, PYI100-10, PCI100-3 | FJ746056                                       | 0-1                                         | 10            |
| <i>Candida parapsilosis</i>     | 29            | PYI1-1, PCI1-1, PCI1-7, PCI2-3, PCI2-5, PYI6-2, PCI88-3, PCI88-8, PCI89-6, PCI89-8, PCI89-9,                                                                                                                                                                                                                                                                                                                                         | U45754                                         | 0-1                                         | 11            |



| Taxa                              | No. of strain | strain                                                                                                                                                                                                                                                                                                                                                                                                                                                                                                                                                                              | D1/D2 GenBank accession no. of closest species | Nucleotide substitutions to closest species | NO.of samples |
|-----------------------------------|---------------|-------------------------------------------------------------------------------------------------------------------------------------------------------------------------------------------------------------------------------------------------------------------------------------------------------------------------------------------------------------------------------------------------------------------------------------------------------------------------------------------------------------------------------------------------------------------------------------|------------------------------------------------|---------------------------------------------|---------------|
| <i>Candida tropicalis</i>         | 44            | PYI91-7, PCI91-5, PCI91-17, PYI93-7, PYI93-8, PYI93-16, PCI93-2, PCI93-5, PCI93-9, PYI95-15, PCI95-10, PCI95-14, PYI96-13, PCI96-15, PCI98-2, PYI100-1, PCI100-4, PCI100-9<br>PYI3-6, PCI3-3, PYI5-1, PYI5-2, PYI5-3, PYI5-4, PYI5-7, PYI5-8, PCI5-1, PCI5-2, PCI5-3, PYI88-3, PYI88-4, PCI88-1, PCI88-2, PCI88-5, PCI88-7, PYI90-7, PYI90-9, PYI90-16, PCI90-1, PCI90-5, PCI90-7, PCI90-9, PCI90-11, PYI91-5, PYI91-6, PCI91-1, PCI91-6, PCI91-7, PCI91-10, PCI91-14, PYI92-1, PYI92-2, PYI92-6, PYI94-7, PYI94-8, PCI94-3, PCI94-6, PYI95-17, PYI98-6, PCI98-3, PYI99-8, PCI100-6 | NG054834                                       | 0-1                                         | 11            |
| <i>Lodderomyces elongisporus</i>  |               |                                                                                                                                                                                                                                                                                                                                                                                                                                                                                                                                                                                     | U45763                                         | 0                                           | 0             |
| <i>Meyerozyma caribbica</i>       | 17            | PYI96-1, PYI96-2, PYI96-7, PYI96-10, PYI96-14, PYI96-15, PYI96-20, PCI96-2, PCI96-3, PCI96-4, PCI96-5, PCI96-7, PCI96-8, PCI96-12, PCI96-13, PCI96-14, PCI96-17                                                                                                                                                                                                                                                                                                                                                                                                                     | AY187283                                       | 0-1                                         | 1             |
| <i>Schwanniomyces etchellsii</i>  | 2             | PYI2-2, PYI96-12                                                                                                                                                                                                                                                                                                                                                                                                                                                                                                                                                                    | U45809                                         | 0                                           | 2             |
| <i>Yamadazyma olivae</i>          |               |                                                                                                                                                                                                                                                                                                                                                                                                                                                                                                                                                                                     | FJ71543                                        | 0                                           | 0             |
| Metschnikowiaceae                 |               |                                                                                                                                                                                                                                                                                                                                                                                                                                                                                                                                                                                     |                                                |                                             |               |
| <i>Candida vulturna</i>           | 1             | PYI100-3                                                                                                                                                                                                                                                                                                                                                                                                                                                                                                                                                                            | JX515965                                       | 2                                           | 1             |
| <i>Kodamaea ohmeri</i>            | 1             | PCI90-8                                                                                                                                                                                                                                                                                                                                                                                                                                                                                                                                                                             | U45702                                         | 0                                           | 1             |
| Phaffomycetaceae                  |               |                                                                                                                                                                                                                                                                                                                                                                                                                                                                                                                                                                                     |                                                |                                             |               |
| <i>Cyberlindnera aff. jadinii</i> | 1             | PYI91-12                                                                                                                                                                                                                                                                                                                                                                                                                                                                                                                                                                            | EF550309                                       | 6                                           | 1             |
| <i>Cyberlindnera jadinii</i>      | 6             | PYI92-3, PYI92-4, PCI93-7, PCI94-1, PCI94-4, PYI97-9                                                                                                                                                                                                                                                                                                                                                                                                                                                                                                                                | EF550309                                       | 5                                           | 4             |
| Pichiaceae                        |               |                                                                                                                                                                                                                                                                                                                                                                                                                                                                                                                                                                                     |                                                |                                             |               |

| Taxa                             | No. of strain | strain                                                                                                                                                               | D1/D2 GenBank accession no. of closest species | Nucleotide substitutions to closest species | NO.of samples |
|----------------------------------|---------------|----------------------------------------------------------------------------------------------------------------------------------------------------------------------|------------------------------------------------|---------------------------------------------|---------------|
| <i>Pichia kudriavzevii</i>       | 19            | PYI3-1, PYI3-2, PYI3-3, PYI3-4, PYI3-5, PCI3-1, PCI3-2, PCI3-4, PYI90-3, PCI90-2, PCI90-10, PYI91-10, PYI91-15, PCI91-4, PYI94-2, PYI94-3, PYI94-4, PYI94-6, PYI94-9 | EF550222                                       | 0-2                                         | 4             |
| <i>Pichia manshurica</i>         | 6             | PYI90-5, PYI90-15, PYI91-11, PYI92-7, PYI93-15, PYI99-11                                                                                                             | U75738                                         | 0-1                                         | 5             |
| Saccharomycetaceae               |               |                                                                                                                                                                      |                                                |                                             |               |
| <i>Candida glabrata</i>          | 6             | PYI89-2, PYI89-4, PYI90-14, PYI97-1, PYI97-3, PYI97-5                                                                                                                | U44808                                         | 1-2                                         | 3             |
| Saccharomycetales incertae sedis |               |                                                                                                                                                                      |                                                |                                             |               |
| <i>Diutina rugosa</i>            | 3             | PYI93-12, PCI95-17, PYI96-19                                                                                                                                         | KT336717                                       | 0                                           | 3             |
| Trichomonascaceae                |               |                                                                                                                                                                      |                                                |                                             |               |
| <i>Wickerhamiella pararugosa</i> | 17            | PYI90-2, PYI90-12, PCI91-18, PYI92-8, PYI93-3, PYI93-9, PCI96-18, PYI97-2, PYI97-4, PYI97-8, PYI97-10, PCI97-1, PCI97-2, PCI97-3, PYI98-8, PYI99-6, PYI99-9          | U62306                                         | 1-2                                         | 8             |
| <b>Basidiomycota</b>             |               |                                                                                                                                                                      |                                                |                                             |               |
| <b>Agaricomycotina</b>           |               |                                                                                                                                                                      |                                                |                                             |               |
| Trichosporonaceae                |               |                                                                                                                                                                      |                                                |                                             |               |
| <i>Trichosporon asahii</i>       | 1             | PYI90-11                                                                                                                                                             | AF105393                                       | 0                                           | 1             |
| <i>Trichosporon japonicum</i>    | 1             | PYI93-5                                                                                                                                                              | AF308657                                       | 0                                           | 1             |
| <b>Pucciniomycotina</b>          |               |                                                                                                                                                                      |                                                |                                             |               |
| Sporidiobolaceae                 |               |                                                                                                                                                                      |                                                |                                             |               |
| <i>Rhodotorula mucilaginosa</i>  | 1             | PYI95-9                                                                                                                                                              | AF070432                                       | 0                                           | 1             |

**Table S4:** Identification of yeast from duodenal epithelium samples based on the D1/D2 domain sequence analysis.

| Taxa                          | No. of strain | strain                                                                                                                                                                                                                                                                                                                                                                                                                | D1/D2 GenBank accession no. of closest species | Nucleotide substitutions to closest species | NO.of samples |
|-------------------------------|---------------|-----------------------------------------------------------------------------------------------------------------------------------------------------------------------------------------------------------------------------------------------------------------------------------------------------------------------------------------------------------------------------------------------------------------------|------------------------------------------------|---------------------------------------------|---------------|
| <b>Ascomycota</b>             |               |                                                                                                                                                                                                                                                                                                                                                                                                                       |                                                |                                             |               |
| <b>Pezizomycotina</b>         |               |                                                                                                                                                                                                                                                                                                                                                                                                                       |                                                |                                             |               |
| Herpotrichiellaceae           |               |                                                                                                                                                                                                                                                                                                                                                                                                                       |                                                |                                             |               |
| <i>Exophiala dermatitidis</i> | 1             | YTD97-8                                                                                                                                                                                                                                                                                                                                                                                                               | NG059225                                       | 0                                           | 1             |
| <b>Saccharomycotina</b>       |               |                                                                                                                                                                                                                                                                                                                                                                                                                       |                                                |                                             |               |
| Debaryomycetaceae             |               |                                                                                                                                                                                                                                                                                                                                                                                                                       |                                                |                                             |               |
| <i>Candida metapsilosis</i>   | 1             | YTD3-2                                                                                                                                                                                                                                                                                                                                                                                                                | NG054815                                       | 0                                           | 1             |
| <i>Candida orthopsilosis</i>  | 37            | CTD3-3, CTD3-4, YTD88-2, YTD88-4, CTD88-8, YTD89-3, YTD89-4, YTD89-7, YTD89-8, CTD89-1, CTD89-2, YTD92-3, YTD92-7, YTD92-8, YTD92-9, CTD92-3, YTD93-4, YTD93-7, YTD95-1, CTD95-1, YTD96-3, YTD96-4, YTD96-7, YTD96-8, CTD96-1, CTD96-4, YTD97-3, YTD97-7, YTD97-12, CTD97-3, CTD97-7, YTD99-1, YTD99-3, YTD99-5, YTD99-7, YTD100-2, CTD100-4                                                                          | FJ746056                                       | 0, 1, 4                                     | 10            |
| <i>Candida parapsilosis</i>   | 73            | YTD2-2, YTD2-3, YTD2-4, CTD2-1, CTD2-2, YTD3-1, YTD3-5, CTD3-5, YTD4-1, YTD4-2, CTD4-1, CTD4-2, YTD5-1, YTD5-2, YTD5-3, YTD6-1, CTD6-1, CTD6-2, YTD88-3, YTD88-6, CTD88-1, CTD88-3, CTD88-6, CTD88-7, CTD88-9, CTD88-10, YTD89-5, YTD89-6, YTD90-2, YTD90-3, YTD90-5, YTD90-9, CTD90-4, CTD90-5, YTD91-1, YTD91-3, YTD91-4, YTD91-6, YTD91-7, YTD91-8, CTD91-1, CTD91-3, CTD91-5, CTD91-6, YTD92-1, YTD92-2, YTD92-5, | U45754                                         | 0                                           | 15            |

| Taxa                                   | No. of strain | strain                                                                                                                                                                                                                                      | D1/D2 GenBank accession no. of closest species | Nucleotide substitutions to closest species | NO.of samples |
|----------------------------------------|---------------|---------------------------------------------------------------------------------------------------------------------------------------------------------------------------------------------------------------------------------------------|------------------------------------------------|---------------------------------------------|---------------|
|                                        |               | CTD92-4, CTD92-6, CTD93-4, CTD93-5, YTD97-1, YTD97-6, YTD97-11, CTD97-1, CTD97-4, CTD97-6, YTD98-1, YTD98-2, YTD98-3, YTD98-7, YTD98-9, YTD98-10, CTD98-1, CTD98-3, CTD98-4, CTD98-5, CTD98-6, YTD99-4, CTD99-1, CTD99-2, CTD99-3, CTD100-3 |                                                |                                             |               |
| <i>Candida tropicalis</i>              | 2             | CTD92-2, CTD97-8                                                                                                                                                                                                                            | NG054834                                       | 0                                           | 2             |
| <i>Candida zeylanoides</i>             | 4             | YTD100-3, YTD100-5, YTD100-9, CTD100-1                                                                                                                                                                                                      | NG060834                                       | 0                                           | 1             |
| <i>Debaryomyces hansenii</i>           | 1             | CTD100-2                                                                                                                                                                                                                                    | NG042634                                       | 0                                           | 1             |
| <i>Meyerozyma caribbica</i>            | 2             | YTD93-5, YTD93-6                                                                                                                                                                                                                            | EU348786                                       | 0                                           | 1             |
| <i>Schwanniomyces etchellsii</i>       | 3             | YTD2-1, YTD96-6, YTD97-10                                                                                                                                                                                                                   | U45809                                         | 0                                           | 3             |
| Metschnikowiaceae                      |               |                                                                                                                                                                                                                                             |                                                |                                             |               |
| <i>Candida duobushaemulonii</i>        | 1             | CTD88-11                                                                                                                                                                                                                                    | AJ508564                                       | 0                                           | 1             |
| <i>Candida vulturna</i>                | 1             | YTD92-4                                                                                                                                                                                                                                     | JX515965                                       | 2                                           | 1             |
| Pichiaceae                             |               |                                                                                                                                                                                                                                             |                                                |                                             |               |
| <i>Pichia manshurica</i>               | 2             | YTD93-1, YTD93-9                                                                                                                                                                                                                            | U75738                                         | 0                                           | 1             |
| Saccharomycetaceae                     |               |                                                                                                                                                                                                                                             |                                                |                                             |               |
| <i>Kluyveromyces marxianus</i>         | 1             | CTD92-5                                                                                                                                                                                                                                     | U94924                                         | 0                                           | 1             |
| Saccharomycetales incertae sedis       |               |                                                                                                                                                                                                                                             |                                                |                                             |               |
| <i>Diutina rugosa</i>                  | 5             | YTD92-10, CTD92-1, CTD93-1, CTD93-2, CTD93-6                                                                                                                                                                                                | KT336717                                       | 0-2                                         | 2             |
| Trichomonascaceae                      |               |                                                                                                                                                                                                                                             |                                                |                                             |               |
| <i>Wickerhamiella aff. infanticola</i> | 2             | CTD88-2, CTD100-5                                                                                                                                                                                                                           | DQ438230                                       | 7                                           | 2             |
| <i>Wickerhamiella pararugosa</i>       | 5             | CTD3-2, YTD6-2, YTD97-9, CTD99-4, CTD99-6                                                                                                                                                                                                   | U62306                                         | 0-2                                         | 4             |
| <i>Yarrowia lipolytica</i>             | 3             | CTD96-3, YTD97-4, YTD97-5                                                                                                                                                                                                                   | AM268450                                       | 0                                           | 2             |

## Basidiomycota

| Taxa                            | No. of strain | strain                                                                                                                        | D1/D2 GenBank accession no. of closest species | Nucleotide substitutions to closest species | NO.of samples |
|---------------------------------|---------------|-------------------------------------------------------------------------------------------------------------------------------|------------------------------------------------|---------------------------------------------|---------------|
| <b>Agaricomycotina</b>          |               |                                                                                                                               |                                                |                                             |               |
| Trichosporonaceae               |               |                                                                                                                               |                                                |                                             |               |
| <i>Trichosporon asahii</i>      | 1             | YTD96-1                                                                                                                       | AF105393                                       | 0                                           | 1             |
| <i>Trichosporon japonicum</i>   | 3             | YTD90-7, CTD90-1, CTD90-3                                                                                                     | AF308657                                       | 0                                           | 1             |
| <b>Pucciniomycotina</b>         |               |                                                                                                                               |                                                |                                             |               |
| Sporidiobolaceae                |               |                                                                                                                               |                                                |                                             |               |
| <i>Rhodotorula mucilaginosa</i> | 14            | YTD3-4, YTD6-3, YTD88-1, CTD88-5, YTD90-4, YTD90-8, YTD91-9, YTD91-10, YTD96-5, YTD97-2, CTD97-5, YTD98-6, YTD100-7, YTD100-8 | AF070432                                       | 0-1                                         | 9             |

**Table S5:** Identification of yeast from jejunal epithelium samples based on the D1/D2 domain sequence analysis.

| Taxa                          | No. of strain | strain                                                                                                                                                                                                                                                                                                                                                                                                                                                               | D1/D2 GenBank accession no. of closest species | Nucleotide substitutions to closest species | NO.of samples |
|-------------------------------|---------------|----------------------------------------------------------------------------------------------------------------------------------------------------------------------------------------------------------------------------------------------------------------------------------------------------------------------------------------------------------------------------------------------------------------------------------------------------------------------|------------------------------------------------|---------------------------------------------|---------------|
| <b>Ascomycota</b>             |               |                                                                                                                                                                                                                                                                                                                                                                                                                                                                      |                                                |                                             |               |
| <b>Pezizomycotina</b>         |               |                                                                                                                                                                                                                                                                                                                                                                                                                                                                      |                                                |                                             |               |
| Herpotrichiellaceae           |               |                                                                                                                                                                                                                                                                                                                                                                                                                                                                      |                                                |                                             |               |
| <i>Exophiala dermatitidis</i> | 1             | YTJ96-11                                                                                                                                                                                                                                                                                                                                                                                                                                                             | NG059225                                       | 0                                           | 1             |
| <b>Saccharomycotina</b>       |               |                                                                                                                                                                                                                                                                                                                                                                                                                                                                      |                                                |                                             |               |
| Debaryomycetaceae             |               |                                                                                                                                                                                                                                                                                                                                                                                                                                                                      |                                                |                                             |               |
| <i>Candida metapsilosis</i>   | 1             | CTJ93-3                                                                                                                                                                                                                                                                                                                                                                                                                                                              | NG054815                                       | 0                                           | 1             |
| <i>Candida orthopsilosis</i>  | 31            | CTJ3-2, YTJ89-3, YTJ89-5, YTJ89-6, CTJ89-2, CTJ89-4, CTJ89-6, YTJ90-8, YTJ92-4, YTJ92-6, CTJ92-5, YTJ93-2, YTJ93-3, YTJ93-4, CTJ93-7, YTJ96-4, YTJ96-10, CTJ96-1, YTJ97-3, YTJ97-5, CTJ97-2, CTJ98-1, CTJ98-2, CTJ98-3, CTJ98-5, CTJ98-9, YTJ100-3, YTJ100-5, YTJ100-7, CTJ100-4, CTJ100-7                                                                                                                                                                           | FJ746056                                       | 0-2                                         | 9             |
| <i>Candida parapsilosis</i>   | 52            | YTJ2-1, YTJ2-2, YTJ2-3, CTJ2-1, CTJ2-2, YTJ3-1, CTJ3-1, YTJ4-2, YTJ4-3, YTJ4-4, CTJ4-1, CTJ4-2, YTJ6-1, YTJ6-2, YTJ6-4, CTJ6-1, CTJ6-2, YTJ89-1, YTJ89-7, CTJ89-1, CTJ89-5, YTJ90-3, YTJ90-5, CTJ90-1, YTJ91-1, YTJ91-4, YTJ91-7, YTJ91-8, YTJ92-1, YTJ92-2, YTJ92-8, CTJ92-1, CTJ92-2, CTJ92-3, YTJ93-5, YTJ93-6, YTJ93-7, YTJ93-10, CTJ93-1, YTJ96-2, YTJ96-9, CTJ97-4, CTJ97-5, CTJ97-6, YTJ98-2, YTJ98-3, YTJ98-4, CTJ98-7, YTJ99-1, CTJ99-8, YTJ100-4, YTJ100-8 | U45754                                         | 0-1                                         | 14            |
| <i>Candida tropicalis</i>     | 3             | CTJ90-3, CTJ92-6, CTJ97-3                                                                                                                                                                                                                                                                                                                                                                                                                                            | NG054834                                       | 0                                           | 3             |

| Taxa                              | No. of strain | strain                                                        | D1/D2 GenBank accession no. of closest species | Nucleotide substitutions to closest species | NO.of samples |
|-----------------------------------|---------------|---------------------------------------------------------------|------------------------------------------------|---------------------------------------------|---------------|
| <i>Candida zeylanoides</i>        | 2             | YTJ99-3, YTJ99-8                                              | NG060834                                       | 0                                           | 1             |
| <i>Debaryomyces hansenii</i>      | 2             | CTJ99-3, CTJ100-3                                             | NG042634                                       | 0                                           | 2             |
| <i>Schwanniomyces etchellsii</i>  | 2             | CTJ96-2, CTJ97-1                                              | U45809                                         | 0                                           | 2             |
| <i>Yamadazyma olivae</i>          | 1             | YTJ4-1                                                        | FJ715430                                       | 0                                           | 1             |
| Metschnikowiaceae                 |               |                                                               |                                                |                                             |               |
| <i>Candida duobushaemulonii</i>   | 1             | CTJ92-4                                                       | AJ508564                                       | 0                                           | 1             |
| <i>Candida vulturna</i>           | 4             | YTJ89-4, CTJ98-8, YTJ99-5, YTJ99-7                            | JX515965                                       | 2                                           | 3             |
| <i>Kodamaea ohmeri</i>            | 2             | YTJ98-1, CTJ99-1                                              | U45702                                         | 0                                           | 2             |
| Pichiaceae                        |               |                                                               |                                                |                                             |               |
| <i>Pichia kudriavzevii</i>        | 1             | CTJ90-2                                                       | EF550222                                       | 1                                           | 1             |
| <i>Pichia manshurica</i>          | 2             | YTJ90-7, YTJ92-7                                              | U75738                                         | 0                                           | 2             |
| Saccharomycetaceae                |               |                                                               |                                                |                                             |               |
| <i>Kluyveromyces marxianus</i>    | 1             | YTJ92-5                                                       | U94924                                         | 0                                           | 1             |
| Saccharomycetales incertae sedis  |               |                                                               |                                                |                                             |               |
| <i>Diutina rugosa</i>             | 6             | CTJ93-5, CTJ93-6, CTJ96-3, YTJ97-4, CTJ100-5, CTJ100-6        | KT336717                                       | 0-1                                         | 4             |
| Trichomonascaceae                 |               |                                                               |                                                |                                             |               |
| <i>Wickerhamiella infanticola</i> | 1             | YTJ96-5                                                       | NG058278                                       | 6                                           | 1             |
| <i>Wickerhamiella pararugosa</i>  | 7             | YTJ90-4, YTJ90-6, YTJ97-7, YTJ97-9, YTJ99-2, YTJ99-4, CTJ99-7 | U62306                                         | 0-2                                         | 3             |
| <b>Basidiomycota</b>              |               |                                                               |                                                |                                             |               |
| <b>Agaricomycotina</b>            |               |                                                               |                                                |                                             |               |
| Trichosporonaceae                 |               |                                                               |                                                |                                             |               |
| <i>Trichosporon japonicum</i>     | 2             | YTJ6-3, CTJ100-2                                              | AF308657                                       | 0                                           | 2             |
| <b>Pucciniomycotina</b>           |               |                                                               |                                                |                                             |               |

| Taxa                            | No. of strain | strain                                                                                                                                                  | D1/D2 GenBank accession no. of closest species | Nucleotide substitutions to closest species | NO.of samples |
|---------------------------------|---------------|---------------------------------------------------------------------------------------------------------------------------------------------------------|------------------------------------------------|---------------------------------------------|---------------|
| Sporidiobolaceae                |               |                                                                                                                                                         |                                                |                                             |               |
| <i>Rhodotorula mucilaginosa</i> | 17            | YTJ89-9, YTJ90-1, YTJ90-2, YTJ91-3, YTJ91-5, YTJ91-6, CTJ91-1, CTJ91-2, CTJ91-3, CTJ91-4, YTJ93-8, CTJ93-4, YTJ96-6, CTJ96-5, YTJ97-6, YTJ99-9, CTJ99-5 | AF070432                                       | 0-1                                         | 7             |



**Table S6:** Identification of yeast from ileal epithelium samples based on the D1/D2 domain sequence analysis.

| Taxa                             | No. of strain | strain                                                                                                                                                                                                                                                                                                                                                                                                                                                                                                        | D1/D2 GenBank accession no. of closest species | Nucleotide substitutions to closest species | NO.of samples |
|----------------------------------|---------------|---------------------------------------------------------------------------------------------------------------------------------------------------------------------------------------------------------------------------------------------------------------------------------------------------------------------------------------------------------------------------------------------------------------------------------------------------------------------------------------------------------------|------------------------------------------------|---------------------------------------------|---------------|
| <b>Ascomycota</b>                |               |                                                                                                                                                                                                                                                                                                                                                                                                                                                                                                               |                                                |                                             |               |
| <b>Saccharomycotina</b>          |               |                                                                                                                                                                                                                                                                                                                                                                                                                                                                                                               |                                                |                                             |               |
| Debaryomycetaceae                |               |                                                                                                                                                                                                                                                                                                                                                                                                                                                                                                               |                                                |                                             |               |
| <i>Candida albicans</i>          | 1             | YTI100-6                                                                                                                                                                                                                                                                                                                                                                                                                                                                                                      | U45776                                         | 1                                           | 1             |
| <i>Candida orthopsilosis</i>     | 30            | YTI1-1, YTI3-3, YTI88-2, CTI88-4, YTI90-1, YTI93-1, YTI93-2, CTI93-1, CTI93-6, YTI96-1, YTI96-3, YTI96-5, YTI96-6, YTI97-1, YTI97-3, CTI97-1, CTI97-2, CTI97-3, CTI97-4, YTI98-3, YTI98-4, YTI98-6, CTI98-4, CTI98-5, CTI98-7, YTI99-1, CTI99-5, YTI100-3, YTI100-10, CTI100-3                                                                                                                                                                                                                                | FJ746056                                       | 0, 1, 3, 5                                  | 10            |
| <i>Candida parapsilosis</i>      | 57            | YTI1-2, YTI1-3, YTI1-4, CTI1-1, CTI1-2, YTI2-1, YTI2-2, YTI2-3, YTI2-4, CTI2-1, CTI2-2, YTI3-1, YTI3-2, CTI3-1, CTI3-2, YTI4-1, YTI4-2, YTI4-3, CTI4-1, CTI4-2, YTI5-1, YTI88-1, YTI88-5, YTI88-6, CTI88-2, CTI88-3, CTI88-5, CTI88-6, YTI89-1, YTI90-3, YTI90-4, YTI90-5, CTI90-1, CTI90-2, CTI90-3, CTI90-4, CTI90-5, CTI92-1, CTI92-2, YTI93-5, YTI93-6, CTI93-4, CTI93-5, CTI96-3, YTI97-4, YTI97-5, CTI98-2, YTI99-2, YTI99-4, YTI99-5, YTI99-6, CTI99-1, CTI99-2, CTI99-6, YTI100-7, CTI100-1, CTI100-5 | U45754                                         | 0-1                                         | 15            |
| <i>Candida tropicalis</i>        | 1             | YTI92-1                                                                                                                                                                                                                                                                                                                                                                                                                                                                                                       | NG054834                                       | 0                                           | 1             |
| <i>Candida zeylanoides</i>       | 1             | YTI88-4                                                                                                                                                                                                                                                                                                                                                                                                                                                                                                       | NG060834                                       | 2                                           | 1             |
| <i>Meyerozyma caribbica</i>      | 2             | YTI98-8, YTI98-9                                                                                                                                                                                                                                                                                                                                                                                                                                                                                              | EU348786                                       | 0                                           | 1             |
| <i>Schwanniomyces etchellsii</i> | 1             | CTI98-3                                                                                                                                                                                                                                                                                                                                                                                                                                                                                                       | U45809                                         | 0                                           | 1             |

| Taxa                             | No. of strain | strain                                                                                                                                | D1/D2 GenBank accession no. of closest species | Nucleotide substitutions to closest species | NO.of samples |
|----------------------------------|---------------|---------------------------------------------------------------------------------------------------------------------------------------|------------------------------------------------|---------------------------------------------|---------------|
| Metschnikowiaceae                |               |                                                                                                                                       |                                                |                                             |               |
| <i>Candida duobushaemulonii</i>  | 3             | YTI100-8, CTI100-2, CTI100-4                                                                                                          | AJ508564                                       | 0                                           | 1             |
| <i>Clavispora lusitaniae</i>     | 1             | YTI100-4                                                                                                                              | AY190538                                       | 0                                           | 1             |
| Pichiaceae                       |               |                                                                                                                                       |                                                |                                             |               |
| <i>Pichia manshurica</i>         | 5             | YTI92-2, YTI92-3, YTI92-5, YTI92-6, CTI92-5                                                                                           | U75738                                         | 0                                           | 1             |
| Saccharomycetaceae               |               |                                                                                                                                       |                                                |                                             |               |
| <i>Kluyveromyces marxianus</i>   | 2             | CTI92-3, CTI92-4                                                                                                                      | U94924                                         | 0                                           | 1             |
| Saccharomycetales incertae sedis |               |                                                                                                                                       |                                                |                                             |               |
| <i>Diutina rugosa</i>            | 2             | CTI96-4, YTI97-2                                                                                                                      | KT336717                                       | 0                                           | 2             |
| Trichomonascaceae                |               |                                                                                                                                       |                                                |                                             |               |
| <i>Wickerhamiella pararugosa</i> | 1             | YTI98-1                                                                                                                               | U62306                                         | 0                                           | 1             |
| <b>Basidiomycota</b>             |               |                                                                                                                                       |                                                |                                             |               |
| <b>Agaricomycotina</b>           |               |                                                                                                                                       |                                                |                                             |               |
| Trichosporonaceae                |               |                                                                                                                                       |                                                |                                             |               |
| <i>Trichosporon asahii</i>       | 1             | YTI100-5                                                                                                                              | AF105393                                       | 0                                           | 1             |
| <b>Pucciniomycotina</b>          |               |                                                                                                                                       |                                                |                                             |               |
| Agaricostilbaceae                |               |                                                                                                                                       |                                                |                                             |               |
| <i>Sterigmatomyces elviae</i>    | 1             | YTI100-12                                                                                                                             | AF177415                                       | 0                                           | 1             |
| Sporidiobolaceae                 |               |                                                                                                                                       |                                                |                                             |               |
| <i>Rhodotorula mucilaginosa</i>  | 15            | YTI3-4, YTI4-4, YTI5-2, YTI90-6, YTI90-7, YTI90-8, CTI90-6, YTI96-4, CTI96-5, CTI96-6, YTI97-8, CTI98-8, YTI99-7, YTI100-9, YTI100-11 | AF070432                                       | 0-1                                         | 9             |
